# Supplementary material for: Erwinia amylovora psychrotrophic adaptations: evidence of pathogenic potential and survival at temperate and low environmental temperatures
Source: PeerJ. 2017 Oct 26;5:e3931. doi: 10.7717/peerj.3931 (PMC5660878; doi:10.7717/peerj.3931)
Supplement: Data S1 [file peerj-05-3931-s003.xlsx]

## Sheet: Fig1
28ºC
Time (days)	Ea 1/79										Ea 1189										CFBP 1430										NCPPB 2080										ATCC 49946
1	0	0	0	0	0	0	0	0	0	0	0	0	0	0	0	0	0	0	0	0	0	0	0	0	0	0	0	0	0	0	0	0	0	0	0	0	0	0	0	0	0	0	0	0	0	0	0	0	0
2	0.242463	0.336835	0.412333	0	0	0	0	0	0	0	0.103601	0.0858407	0.142081	0	0	0	0	0	0		0.41434	0.335062	0.382928	1.44047	0.180993	0.562425	1.49731	0.361986	0	0	0.446418	0.139413	0	0	0	0	0	0	0	0	0.211123	0.178868	0.0821033	0.133418	0.526341	0.104095	0.586452	0.266836	0.187665
3	0.0876498	0.120264	0.175299	0.933572	0.880574	0.167146	0.108033	0.218105	0.613548	0	1.16614	0.904942	0.215952	0.816505	0.193328	0.7075	1.61656	0.505945	1.08182	0.686933	2.08969	1.1569	0.339196	0.43409	1.02566	1.12661	1.08421	1.33054	0.4139	1.8252	0.264279	0.850199	0.227403	1.13087	1.63484	0.299106	0.960827	1.10833	0.635088	0.346226	1.47536	0.333278	1.49568	0.560882	0.485691	0.162574	0.833194	0.434887	0.881966
4	0.155412	0.518041	0.275597	0.300463	0.94905	1.23086	0.501463	0.426865	1.54169	0.447587	2.17012	0.987919	1.05406	1.19873	2.66201	2.16598	2.06058	0.18601	1.21733	1.07059	2.36288	1.0595	1.10254	1.20091	1.61078	0.934496	1.82391	1.35666	2.23172	0.514382	0.648421	0.431572	1.59448	1.33936	2.06432	0.937552	1.31385	1.92825	0.886529	1.25857	1.5755	0.403659	1.7382	0.926767	1.55079	0.39748	1.35102	1.26452	1.33249
5	0.773732	0.242575	0.508153	0.690085	1.24424	1.39899	1.14178	0.545794	1.48473	0.987031	3.35638	1.84133	1.42984	3.14856	1.86004	3.66812	0.284721	2.42325	1.95564	1.74573	1.88652	2.33588	0.997912	3.01803	2.38851	2.80144	1.41894	2.20026	1.79746	0.694288	1.56611	1.82713	1.69766	1.99209	1.33224	2.18629	1.94615	1.45753	1.91065	1.19442	1.55073	1.06223	2.07457	1.55697	1.08094	0.989475	1.3782	1.83136	2.08704
6	0.741624	1.03987	0.334927	0.955339	1.81658	1.80223	1.39712	0.955339	1.22009	1.90749	3.60214	2.74344	1.66421	2.47129	3.6256	3.92122	1.18403	3.22675	3.07191	2.28047	2.35129	1.39548	2.6683	2.99486	1.8925	2.64918	2.35129	1.90843	3.20833	1.8479	2.01417	2.54695	2.66066	3.04238	3.01964	1.66819	3.05537	1.8891	3.04238	2.01092	3.20336	3.25428	1.67232	2.09122	1.57704	1.58197	1.79224	2.05179	2.66782
7	1.88881	1.51978	1.23059	1.87525	0.415718	1.9355	2.07558	1.97315	2.25934	1.24565	3.07479	3.94228	3.26555	2.95519	4.16028	4.09821	3.55168	4.12092	1.29895	3.49264	2.54616	1.36826	3.38646	2.72463	2.33795	3.02059	2.6577	2.39893	3.09942	2.43759	3.17008	2.35104	1.55384	3.56946	2.89551	4.05153	3.29801	4.09365	3.30893	1.84713	3.30628	2.35488	3.5955	2.18439	2.76741	3.19972	2.61519	2.69739	2.38228
14ºC
Time (days)	Ea 1/79										Ea 1189										CFBP 1430										NCPPB 2080										ATCC 49946
5	0	0	0	0	0	0	0	0	0	0	0	0	0	0	0	0	0	0	0	0	0	0	0	0	0	0	0	0	0	0	0	0	0	0	0	0	0	0	0	0	0	0	0	0	0	0	0	0	0
7	0.187012	0.1915	0	0.278273	0.119688	0.0733086	0	0	0	0	0.115618	0.0675689	0.142646	0.211716	0	0	0	0	0	0	0	0	0	0	0	0	0	0	0	0	0	0	0	0	0	0	0	0	0	0	0.675167	0.164973	0.253569	0	0	0	0	0	0
9	0.279661	0.216271	0.193898	0.231186	0.145424	0.674915	0.279661	0.244237	0.115593	0	0.26827	0.996697	0.219832	1.10475	0.257092	0	0	0	0	0	0.813438	0.371965	1.14971	0.794652	0.127746	0.666907	0.591762	0.317485	0	0	0.0808423	0.141004	0.152284	0.0827224	0.0620418	0.0921226	0	0	0	0	0.470224	1.21073	0.26103	0.398024	0.149953	0.0703485	0.27584	0.138846	0.264732
11	0.249934	0.361693	0.209294	0.640076	1.55244	0.154431	0.424685	1.11962	0.282446	0	1.42252	0.100005	1.73274	0.348997	0.555129	1.03883	0.993927	2.27154	0.316342	0.902085	1.09934	2.43688	1.35179	2.1824	2.08265	0.576138	1.67955	1.59405	1.53908	1.14006	0.352971	0.23325	0.152748	0.17339	0.13417	0.220865	0.0949514	0.125914	0	0	1.14899	2.71874	0.384346	0.934568	0.238699	1.80643	0.83747	0.0910294	1.40387
13	0.747497	0.307652	0.544399	0.263186	1.06476	0.564829	1.10202	1.64281	0.243958	1.96128	1.74097	0.623541	2.06983	0.669511	1.49108	1.27537	1.8164	0.384262	2.34918	1.74568	1.95842	2.44327	1.50803	2.28522	2.84018	2.32919	1.52704	1.74095	2.88653	2.39217	0.728763	0.678647	0.820642	1.15892	0.33828	0.309046	0.816465	0.398836	0.279812	0	3.26553	1.86702	1.68809	0.85464	1.15482	1.57273	2.53331	0.356689	1.90352
16	1.00311	0.581685	1.22273	1.29791	0.57575	0.344263	1.17722	1.96467	2.08338	2.15263	2.53476	2.7772	2.43621	0.989463	2.52688	3.25025	0.839664	2.06565	2.19968	1.47631	3.42689	3.72356	2.28661	3.07774	3.04343	2.88399	3.31185	3.29772	2.96876	2.9849	0.425548	0.829221	0.600539	0.570711	0.711897	0.413616	0.74968	0.515032	0.690023	0	2.98125	3.97433	1.12523	2.18438	2.2885	3.25555	2.08027	1.24336	2.86312
20	1.79372	0.712287	1.88903	2.41762	0.975712	2.06581	1.92369	2.82315	0.902923	2.90461	2.72204	3.07282	3.47446	1.74161	3.50252	3.21313	2.86761	3.06229	3.34993	2.64311	4.19988	3.39328	3.72879	3.61753	4.27985	4.30766	4.19988	3.45065	3.53409	4.14426	1.04336	1.31683	0.850016	0.731572	0.96672	0.390172	0.759441	0.520809	0.923174	0	3.17034	3.23453	2.90287	3.36826	4.18313	3.91389	2.87256	2.2253	4.2812
4ºC
Time (days)	Ea 1/79										Ea 1189										CFBP 1430										NCPPB 2080										ATCC 49946
31	0	0	0	0	0	0	0	0	0	0	0.195649	0	0	0	0	0	0	0	0	0	0	0	0	0	0	0	0	0	0	0	0	0	0	0	0	0	0	0	0	0	0	0	0	0	0	0	0	0	0
35	0	0	0	0	0	0	0	0	0	0	0.459803	0.195649	0	0	0	0	0	0	0	0	0.995188	0.717388	0.593027	0.578563	1.83694	0	0	0	0	0	0	0	0	0	0	0	0	0	0	0	0.334764	0	0	0	0	0	0	0	0
39	0	0	0	0	0	0	0	0	0	0	0.418722	0.217379	0.244106	0.76439	0.213815	0	0	0	0	0	1.28928	0.262695	0.63427	1.1683	0.198749	1.70406	0.387129	1.03523	1.00585	0	0.421038	0.577173	0.345602	0	0	0	0	0	0	0	0.374455	0.234472	0	0	0	0	0	0	0
44	0	0	0	0	0	0	0	0	0	0	0.490277	0.216883	0.384891	0.788109	1.36392	0	0	0	0	0	0.973994	0.707643	0.324665	0.343577	1.69109	1.89283	0.82427	1.97163	1.24035	1.73838	1.28347	0.33611	0.48306	1.44449	0.273577	0.651896	0.751947	0	0	0	0.437807	0.247934	0.644941	0	0	0	0	0	0
50	0	0	0	0	0	0	0	0	0	0	1.27794	0.866746	0.26446	0.262754	0.378775	1.60211	0	0	0	0	2.7142	0.776915	0.730234	0.190061	3.56948	2.98596	1.82892	1.41712	2.28573	2.5975	2.31136	0.713552	1.54489	0.349948	1.32468	0.484806	1.45783	0.681118	0.64527	0	1.44747	1.43353	0.726346	0.371011	0	0	0	0	0
64	0	0	0	0	0	0	0	0	0	0	2.81817	3.58905	2.53602	1.98683	1.16388	2.62839	3.68478	3.67974	2.96596	0	3.94594	3.74805	4.75272	2.77045	3.01738	4.28083	3.28124	4.62248	3.71761	3.49604	1.89813	2.16699	3.2537	3.44367	1.93998	2.42297	3.16998	1.39582	2.67573	2.6226	3.12481	1.80511	1.08543	1.7023	3.51584	1.76297	0	0	0
79	0.307045	2.96749	0.853108	0.332786	0.763017						4.74206	4.63826	4.41427	5.21918	5.06985	4.42338	4.23581	4.61641	1.95947	3.68948	5.05525	4.36451	4.93622	4.52682	4.0002	4.57371	5.27528	5.08772	6.07784	4.80096	3.59118	3.76306	3.94956	5.00278	3.72466	4.66451	4.11778	5.13809	5.14906	4.29332	4.00646	3.94127	2.37668	3.82393	4.50005	5.62506	5.99945	1.69124	0
* 0 = No visible necrosis
[truncated: 6 more columns]
