# Supplementary material for: Erwinia amylovora psychrotrophic adaptations: evidence of pathogenic potential and survival at temperate and low environmental temperatures
Source: PeerJ. 2017 Oct 26;5:e3931. doi: 10.7717/peerj.3931 (PMC5660878; doi:10.7717/peerj.3931)
Supplement: Data S2 [file peerj-05-3931-s004.xlsx]

## Sheet: Fig2_RAW
Time (h)	Ea 1/79 28ºC		Ea 1189 28ºC		CFBP 1430 28ºC		NCPPB 2080 28ºC		ATCC 49946 28ºC		Ea 1/79 14ºC		Ea 1189 14ºC		CFBP 1430 14ºC		NCPPB 2080 14ºC		ATCC 49946 14ºC		Ea 1/79 4ºC		Ea 1189 4ºC		CFBP 1430 4ºC		NCPPB 2080 4ºC		ATCC 49946 4ºC
0	0.152	0.163	0.152	0.189	0.165	0.163	0.139	0.151	0.138	0.128	0.152	0.163	0.152	0.189	0.165	0.163	0.139	0.151	0.138	0.128	0.133	0.134	0.16	0.15	0.154	0.137	0.138	0.136	0.141	0.134
0.25	0.234	0.227	0.246	0.248	0.243	0.231	0.18	0.181	0.253	0.255	ND	ND	ND	ND	ND	ND	ND	ND	ND	ND	ND	ND	ND	ND	ND	ND	ND	ND	ND	ND
0.33	0.292	0.259	0.272	0.285	0.265	0.246	0.2	0.195	0.291	0.28	ND	ND	ND	ND	ND	ND	ND	ND	ND	ND	ND	ND	ND	ND	ND	ND	ND	ND	ND	ND
0.625	0.342	0.33	0.368	0.366	0.29	0.28	0.23	0.22	0.355	0.346	ND	ND	ND	ND	ND	ND	ND	ND	ND	ND	ND	ND	ND	ND	ND	ND	ND	ND	ND	ND
0.75	0.365	0.363	0.407	0.414	0.318	0.317	0.254	0.247	0.4	0.384	ND	ND	ND	ND	ND	ND	ND	ND	ND	ND	ND	ND	ND	ND	ND	ND	ND	ND	ND	ND
1	0.441	0.423	0.449	0.463	0.376	0.436	0.299	0.297	0.45	0.45	0.237	0.239	0.266	0.277	0.255	0.247	0.233	0.239	0.239	0.269	0.171	0.177	0.21	0.183	0.188	0.201	0.168	0.177	0.177	0.214
1.125	0.487	0.467	0.508	0.512	0.42	0.404	0.325	0.321	0.494	0.489	ND	ND	ND	ND	ND	ND	ND	ND	ND	ND	ND	ND	ND	ND	ND	ND	ND	ND	ND	ND
1.3	0.53	0.51	0.545	0.555	0.463	0.448	0.365	0.354	0.55	0.543	ND	ND	ND	ND	ND	ND	ND	ND	ND	ND	ND	ND	ND	ND	ND	ND	ND	ND	ND	ND
1.5	0.64	0.62	0.655	0.665	0.573	0.558	0.475	0.464	0.66	0.653	ND	ND	ND	ND	ND	ND	ND	ND	ND	ND	ND	ND	ND	ND	ND	ND	ND	ND	ND	ND
1.8	0.76	0.74	0.775	0.785	0.693	0.678	0.625	0.614	0.78	0.773	ND	ND	ND	ND	ND	ND	ND	ND	ND	ND	ND	ND	ND	ND	ND	ND	ND	ND	ND	ND
2	0.776	0.753	0.77	0.754	0.76	0.763	0.733	0.711	0.713	0.759	0.305	0.311	0.337	0.323	0.317	0.295	0.288	0.278	0.282	0.28	0.194	0.181	0.19	0.205	0.193	0.18	0.183	0.183	0.182	0.195
2.5	0.806	0.783	0.8	0.784	0.79	0.793	0.783	0.851	0.743	0.789	ND	ND	ND	ND	ND	ND	ND	ND	ND	ND	ND	ND	ND	ND	ND	ND	ND	ND	ND	ND
3	0.825	0.809	0.826	0.819	0.835	0.8	0.8	0.987	0.827	0.833	0.364	0.368	0.373	0.381	0.373	0.36	0.321	0.337	0.313	0.308	0.179	0.179	0.198	0.196	0.197	0.194	0.179	0.178	0.18	0.181
3.5	0.837	0.821	0.838	0.831	0.847	0.812	0.812	0.999	0.839	0.845	ND	ND	ND	ND	ND	ND	ND	ND	ND	ND	ND	ND	ND	ND	ND	ND	ND	ND	ND	ND
4	0.836	0.819	0.808	0.809	0.822	0.802	0.817	0.812	0.809	0.796	0.455	0.46	0.445	0.465	0.431	0.423	0.401	0.394	0.359	0.343	0.221	0.219	0.238	0.236	0.222	0.219	0.21	0.208	0.209	0.216
6	ND	ND	ND	ND	ND	ND	ND	ND	ND	ND	0.541	0.536	0.52	0.534	0.519	0.5	0.475	0.466	0.46	0.436	0.244	0.254	0.308	0.299	0.282	0.281	0.257	0.273	0.275	0.291
7	ND	ND	ND	ND	ND	ND	ND	ND	ND	ND	0.574	0.579	0.563	0.576	0.554	0.543	0.504	0.522	0.483	0.478	0.27	0.26	0.292	0.281	0.283	0.257	0.257	0.249	0.246	0.249
8	ND	ND	ND	ND	ND	ND	ND	ND	ND	ND	0.64	0.668	0.609	0.65	0.572	0.601	0.564	0.556	0.533	0.531	0.336	0.326	0.343	0.349	0.289	0.32	0.312	0.317	0.334	0.337
9	ND	ND	ND	ND	ND	ND	ND	ND	ND	ND	0.673	0.697	0.665	0.683	0.659	0.637	0.602	0.607	0.576	0.569	0.355	0.363	0.358	0.359	0.356	0.324	0.324	0.324	0.337	0.311
10	ND	ND	ND	ND	ND	ND	ND	ND	ND	ND	0.703	0.727	0.695	0.713	0.689	0.667	0.632	0.637	0.606	0.599	ND	ND	ND	ND	ND	ND	ND	ND	ND	ND
11	ND	ND	ND	ND	ND	ND	ND	ND	ND	ND	0.725	0.749	0.717	0.735	0.711	0.689	0.654	0.659	0.628	0.621	ND	ND	ND	ND	ND	ND	ND	ND	ND	ND
12	ND	ND	ND	ND	ND	ND	ND	ND	ND	ND	0.747	0.771	0.739	0.757	0.733	0.711	0.66	0.661	0.625	0.633	ND	ND	ND	ND	ND	ND	ND	ND	ND	ND
13	ND	ND	ND	ND	ND	ND	ND	ND	ND	ND	0.754	0.764	0.779	0.764	0.743	0.748	0.676	0.663	0.655	0.674	0.395	0.39	0.394	0.388	0.384	0.359	0.472	0.351	0.361	0.358
14	ND	ND	ND	ND	ND	ND	ND	ND	ND	ND	0.739	0.758	0.769	0.768	0.741	0.739	0.648	0.671	0.658	0.678	0.418	0.411	0.428	0.401	0.408	0.389	0.363	0.373	0.386	0.381
15	ND	ND	ND	ND	ND	ND	ND	ND	ND	ND	0.744	0.747	0.754	0.755	0.708	0.732	0.666	0.675	0.659	0.647	0.43	0.427	0.441	0.408	0.437	0.409	0.385	0.413	0.402	0.4
16	ND	ND	ND	ND	ND	ND	ND	ND	ND	ND	ND	ND	ND	ND	ND	ND	ND	ND	ND	ND	0.459	0.485	0.429	0.446	0.45	0.427	0.401	0.426	0.419	0.467
19	ND	ND	ND	ND	ND	ND	ND	ND	ND	ND	ND	ND	ND	ND	ND	ND	ND	ND	ND	ND	0.476	0.473	0.449	0.453	0.44	0.447	0.422	0.448	0.427	0.444
21	ND	ND	ND	ND	ND	ND	ND	ND	ND	ND	ND	ND	ND	ND	ND	ND	ND	ND	ND	ND	0.488	0.479	0.468	0.454	0.467	0.432	0.443	0.429	0.458	0.426
23	ND	ND	ND	ND	ND	ND	ND	ND	ND	ND	ND	ND	ND	ND	ND	ND	ND	ND	ND	ND	0.526	0.517	0.49	0.491	0.495	0.461	0.504	0.509	0.471	0.465
26	ND	ND	ND	ND	ND	ND	ND	ND	ND	ND	ND	ND	ND	ND	ND	ND	ND	ND	ND	ND	0.509	0.519	0.471	0.466	0.491	0.473	0.456	0.473	0.465	0.48
30	ND	ND	ND	ND	ND	ND	ND	ND	ND	ND	ND	ND	ND	ND	ND	ND	ND	ND	ND	ND	0.521	0.558	0.526	0.516	0.529	0.503	0.499	0.516	0.502	0.511
36	ND	ND	ND	ND	ND	ND	ND	ND	ND	ND	ND	ND	ND	ND	ND	ND	ND	ND	ND	ND	0.547	0.508	0.479	0.465	0.476	0.453	0.463	0.479	0.466	0.477
