# Supplementary material for: Erwinia amylovora psychrotrophic adaptations: evidence of pathogenic potential and survival at temperate and low environmental temperatures
Source: PeerJ. 2017 Oct 26;5:e3931. doi: 10.7717/peerj.3931 (PMC5660878; doi:10.7717/peerj.3931)
Supplement: Data S5 [file peerj-05-3931-s007.xlsx]

## Sheet: Hoja1
Amylovoran production
(A600CPC/A600Cultures)	28ºC						14ºC						4ºC
	1 dpi		3 dpi		7 dpi		1 DPI		3 DPI		7 DPI		1 DPI		3 DPI		7 DPI
Ea 1/79	6.75	6.6625	3.28115	3.66546	2.468	2.5303	11.4829	10.8302	3.63929	4.04545	2.2249	2.05396	14.3611	13.7817	9.40695	9.93939	7.10452	7.52732
Ea 1189	5.30275	5.53606	3.42327	3.30445	2.33574	2.21799	9.51049	10.8949	4.53581	4.83841	2.41743	2.42857	13.3254	14.5813	9.33333	10.6135	8.47953	8.02521
CFBP 1430	6.54545	6.08757	3.03077	2.56291	2.63374	2.73469	9.73251	9.52965	2.79286	2.8705	1.85811	1.79381	15.3392	15.4655	11.8889	11.3778	5.84524	6.21687
NCPPB 2080	7.80415	8.07463	4.35963	4.51754	1.76604	1.79743	12.8419	13.0952	8.53395	8.59813	4.33813	3.94737	10.6357	14.1469	11.9608	12.9655	10.7568	10.3333
ATCC 49946	7.06473	6.78571	4.48771	4.73721	3.31718	2.55556	10.4444	10.7649	7.41333	7.83747	4.19868	4.29252	12.6509	12.1795	10.3371	10.1143	8.90332	9.05386
Levan production
(A580Levan/A600Cultures)	28ºC						14ºC						4ºC
	1 DPI		3 DPI		7 DPI		1 DPI		3 DPI		7 DPI		1 DPI		3 DPI		7 DPI
Ea 1/79	0.0785838	0.0817556	0.265854	0.314912	0.234364	0.263576	0.0196429	0.0238095	0.314778	0.274359	0.307299	0.270819	0	0	0.0282486	0.0491228	0.201093	0.168205
Ea 1189	0.108558	0.0963665	0.245082	0.239147	0.210508	0.199355	0.00766871	0.00788644	0.301622	0.272662	0.354436	0.334615	0	0	0.0379538	0.0423012	0.161255	0.152216
CFBP 1430	0.011534	0.0170068	0.126136	0.157047	0.258576	0.233904	0.0131579	0.0108225	0.21	0.12314	0.241697	0.269686	0.00320513	0.00311526	0.0146342	0.0166667	0.0726316	0.113483
NCPPB 2080	0.0542522	0.0198777	0.367769	0.354762	0.0838608	0.0784314	0.0185185	0.148148	0.479853	0.440678	0.414151	0.391905	0	0	0.0755814	0.0788955	0.292208	0.289169
ATCC 49946	0.0168142	0.0206463	0.138057	0.122747	0.0731579	0.121413	0.00943396	0.00760456	0.337418	0.296296	0.265168	0.348476	0	0	0.0476191	0.0411985	0.150538	0.194946
