# Supplementary material for: Erwinia amylovora psychrotrophic adaptations: evidence of pathogenic potential and survival at temperate and low environmental temperatures
Source: PeerJ. 2017 Oct 26;5:e3931. doi: 10.7717/peerj.3931 (PMC5660878; doi:10.7717/peerj.3931)
Supplement: Data S7 [file peerj-05-3931-s009.xlsx]

## Sheet: Hoja1
Survival assays: culturability (Log CFU/mL))
	28ºC															14ºC															4ºC
Time (days)	Ea 1/79			Ea 1189			CFBP 1430			NCPPB 2080			ATCC 49946			Ea 1/79			Ea 1189			CFBP 1430			NCPPB 2080			ATCC 49946			Ea 1/79			Ea 1189			CFBP 1430			NCPPB 2080			ATCC 49946
0	7.35539	7.45738	7.39211	7.49601	7.5141	7.5006	7.44716	7.48667	7.45738	7.5141	7.48667	7.44196	7.27107	7.02803	7.22185	7.35539	7.45738	7.39211	7.49601	7.5141	7.5006	7.44716	7.48667	7.45738	7.5141	7.48667	7.44196	7.27107	7.02803	7.22185	7.35539	7.45738	7.39211	7.49601	7.5141	7.5006	7.44716	7.48667	7.45738	7.5141	7.48667	7.44196	7.27107	7.02803	7.22185
1	7.23888	7.27107	7.32222	7.4523		7.47712	7.30821	7.34242	7.43136		7.42597	7.41497	7.35539	7.24716	7.29373	7.37414	7.43136	7.32222	7.48667	7.48192	7.47227	7.44196	7.36173	7.46736	7.43136	7.52288	7.40369	7.25527	7.18564	7.11394	7.34242	7.23045	7.29373	7.34242	7.25527	7.39794	6.90309	7.02803	7.16633	7.16633	7.40937	7.37414	7.18564	7.26324	7.26324
3	7.34895	7.26324	7.33579	7.34242	7.34895	7.35539	7.36173	7.39794	7.37414	7.27107	7.32906		7.15635	7.13566	7.13566	7.29373	7.24716	7.27107	7.3862	7.47227	7.53991	7.27875	7.31527	7.32906	7.39211	7.4624	7.3862	7.09108	7.11394	7.15635	7.25527	7.18564	7.23045	7.41497	7.36798	7.40937	7.31527	7.15635	7.12494	7.41497	7.40369	7.44196	7.13566	7.07918	7.02803
8	7.01424	6.90309	6.88461	7.02803	6.69897	7.13566	6.66901	6.75333	6.80163	6.33579	6.43136	6.60924	6.82391	6.66901	6.75333	7.15635	7.16633	7.04139	7.25527	7.36798	7.28631	7.17609	7.17609	7.18564	7.16633	7.30821	7.21307	7.12494	6.92082	7.07918	6.88461	6.88461	6.80163	6.82391	6.82391	6.727	7.10266	7.13566	7.06695	7.18564	7.20412	7.30103	6.727	6.75333	6.75333
20	4.56427	4.8653	4.60206	5.45738	5.43669	5.33579	5.25527	5.27875		5.37414		3.82391	3.52288	4		6.97004	6.92082	7.04139	7.20412	7.19498	7.14613	7.17609	7.05436	7.11394	6.80163	7.11394	7.09108	6.97004	6.92082	6.90309	6.40369	6.38021	6.60206	6.52288	6.60206	6.69897	6.18564	5.88461	6.16633	6.19498	6.22185	6.37414	5.06695	6.13566	6.27875
38	3.12385	3.86864	2.91908	4.41364	1.90309	4.10037	2.25527	4.14239	2.61278	1	1	1	2.86332	1	1	7.09108	7.01424	7.14613	7.16633	7.07918	7.05436	7.06695	7.10266	7.09108	7.4624	7.01424	7	7.01424	6.95424	6.52288	5.88461	5.90309	5.77815	6.06695	5.95424	5.82391	5.02803	4.82391	5.10266	4.66901	4.30103	4.77815	5.04139	5.30103	5.15635
67	0	3.46835	0	2.49136	0	1.30103	1	1	1	1	1	1	2.51851	1	1	6.66901	6.63682	6.77815	7.02803	7.04139	6.8451	6.77815	6.60206	6.97004	7.22185	6.47712	6.56427	6.88461	6.66901	6.80163	4.21307	4.28631	4.16633	4.23045	4.18564	3.82391	2.30103	2.22185	2.42597	1	1	1	3.82391	3.88461	3.22185
88	1	1	1	1	1	1	1	1	1	1	1	1	1	1	1	6.34895	6.3862	6.36173	6.727	6.90309	6.63682	6.82391	6.69897	6.82391	5.93785	6.30821	6.31527	6.43669	6.50965	6.27875	3.60206	3.52288	5.32222	3.47712	2.82391	3.32222	1	1.82391	1.52288	1	1	1	3.52288	3.82391	3.42597
122	1	1	1	1	1	1	1	1	1	1	1	1	1	1	1	5.8451	6.01424	6.05436	6.92082	7.32222	6.727	6.90309	6.43669	7.01424	5.30103	5.42597	5.47712	5.77815	5.52288	5.10266	2.5	2.5	2.5	2	2	2	1	1	1	1	1	1	2.5	2.5	2.5
Viable, dead, total (Log cells / mL)
		28ºC							14ºC						4ºC
	STRAIN	time	Live		Dead		Total		Live		Dead		Total		Live		Dead		Total
	Ea 1/79	0	64080000	64080000	18480000	18480000	82560000	82560000	53400000	53400000	15400000	15400000	96320000	96320000	53400000	53400000	15400000	15400000	68800000	68800000
		122 dpi	30100000	27150000	50850000	52800000	80950000	79950000	44925000	44575000	43875000	43625000	88800000	88200000	55225000	56500000	35950000	38950000	91175000	95450000
	Ea 1189	0	83212500	83212500	39987500	39987500	123200000	123200000	83212500	83212500	39987500	39987500	123200000	123200000	83212500	83212500	39987500	39987500	123200000	123200000
		122 dpi	23675000	25625000	55550000	59150000	79225000	84775000	34350000	33500000	52650000	55175000	87000000	88675000	57550000	60375000	33800000	33675000	91350000	94050000
	CFBP 1430	0	60675000	60675000	51475000	51475000	112150000	112150000	60675000	60675000	51475000	51475000	112150000	112150000	60675000	60675000	51475000	51475000	112150000	112150000
		122 dpi	35950000	39400000	47625000	47250000	83575000	86650000	23750000	35175000	30883500	49425000	54633500	84600000	46400000	48825000	39025000	36650000	85425000	85475000
	NCPPB 2080	0	46150000	46150000	74950000	74950000	121100000	121100000	46150000	46150000	74950000	74950000	121100000	121100000	46150000	46150000	74950000	74950000	121100000	121100000
		122 dpi	17250000	16225000	56300000	53275000	73550000	69500000	34250000	34550000	50450000	51075000	84700000	85625000	59600000	61150000	30750000	32075000	90350000	93225000
	ATCC 49946	0	68100000	68100000	39150000	39150000	107250000	107250000	68100000	68100000	39150000	39150000	107250000	107250000	68100000	68100000	39150000	39150000	107250000	107250000
		122 dpi	29675000	23050000	52825000	57300000	82500000	80350000	45075000	43250000	44675000	47625000	89750000	90875000	56400000	52175000	35950000	38975000	92350000	91150000
VBNC
		VBNC t0			VBNC t122 (28ºC)			VBNC t122 (14ºC)			VBNC t122 (4ºC)
	Ea 1/79	0.42	0.54	0.38	7.47	7.5	7.53	1.68	1.57	1.79	5.25	5.24	5.26
	Ea 1189	0.3	0.35	0.4	7.53	7.51	7.55	0.76	0.46	1.06	5.76	5.61	5.91
	CFBP 1430	0.26	0.024	0.028	7.4	7.42	7.38	0.83	0.63	1.03	7.68	7.66	7.7
	NCPPB 2080	0.27	0.35	0.16	7.53	7.55	7.43	2.34	2.4	2.28	7.78	7.66	7.57
	ATCC 49946	0.61	0.51	0.72	7.52	7.56	7.48	2.18	2.2	2.16	5.23	5.24	5.22
