# Supplementary material for: Erwinia amylovora psychrotrophic adaptations: evidence of pathogenic potential and survival at temperate and low environmental temperatures
Source: PeerJ. 2017 Oct 26;5:e3931. doi: 10.7717/peerj.3931 (PMC5660878; doi:10.7717/peerj.3931)
Supplement: Data S8 [file peerj-05-3931-s010.xlsx]

## Sheet: Hoja1
Areas	28ºC
Ea 1/79	0.367742	0.225806	0.303226	0.367742	0.296774	0.535484	0.187097	0.232258	0.290323	0.264516	0.232258	0.290323	0.225806	0.23871	0.316129	0.290323	0.309677	0.4	0.258064	0.316129	0.23871	0.270968	0.187097	0.212903	0.225806	0.206452	0.258064	0.2	0.419355	0.264516	0.277419	0.406452	0.277419	0.219355	0.335484	0.354839	0.387097	0.270968	0.245161	0.232258	0.245161	0.283871	0.36129	0.335484	0.348387	0.187097	0.174194	0.154839	0.36129
Ea 1189	0.180556	0.340278	0.291667	0.305556	0.340278	0.236111	0.1875	0.277778	0.25	0.159722	0.25	0.208333	0.263889	0.256944	0.291667	0.1875	0.256944	0.256944	0.180556	0.173611	0.25	0.152778	0.173611	0.229167	0.256944	0.319444	0.152778	0.194444	0.229167	0.243056	0.215278	0.3125	0.277778	0.194444	0.3125	0.291667	0.215278	0.270833	0.173611	0.152778	0.368056	0.333333	0.215278	0.3125	0.194444	0.243056	0.229167	0.173611	0.25
CFBP 1430	0.181818	0.198347	0.198347	0.264463	0.272727	0.297521	0.22314	0.371901	0.256198	0.173554	0.247934	0.239669	0.264463	0.371901	0.181818	0.396694	0.247934	0.214876	0.297521	0.355372	0.380165	0.22314	0.264463	0.338843	0.280992	0.214876	0.206612	0.338843	0.297521	0.214876	0.305785	0.272727	0.297521	0.322314	0.289256	0.297521	0.231405	0.330578	0.363636	0.31405	0.31405	0.355372	0.173554	0.396694	0.157025	0.264463	0.22314	0.183554	0.406694
NCPPB 2080	0.333333	0.243056	0.270833	0.340278	0.215278	0.388889	0.215278	0.409722	0.263889	0.263889	0.3125	0.270833	0.284722	0.263889	0.284722	0.361111	0.340278	0.3125	0.409722	0.291667	0.25	0.3125	0.319444	0.326389	0.291667	0.284722	0.222222	0.361111	0.298611	0.3125	0.326389	0.284722	0.25	0.270833	0.201389	0.236111	0.3125	0.319444	0.243056	0.298611	0.334333	0.244056	0.271833	0.341278	0.216278	0.389889	0.216278	0.410722	0.264889
ATCC 49946	0.354167	0.305556	0.451389	0.284722	0.444444	0.236111	0.319444	0.284722	0.25	0.368056	0.319444	0.298611	0.222222	0.340278	0.270833	0.194444	0.319444	0.3125	0.243056	0.326389	0.3125	0.25	0.340278	0.215278	0.355167	0.306556	0.452389	0.285722	0.445444	0.237111	0.320444	0.285722	0.251	0.369056	0.320444	0.299611	0.223222	0.341278	0.271833	0.195444	0.320444	0.3135	0.244056	0.327389	0.3135	0.251	0.341278	0.216278	0.356167
Feret diameters	28ºC
Ea 1/79	0.897992	0.64755	0.718394	0.967229	0.740562	1.22602	0.579197	0.740562	0.803213	0.803213	0.690924	0.803213	0.686265	0.690924	0.803213	0.803213	0.826988	0.936707	0.64755	0.868835	0.740562	0.826988	0.579197	0.627309	0.64755	0.579197	0.757751	0.579197	1.00643	0.740562	0.690924	1.00643	0.757751	0.718394	0.718394	0.940161	0.936707	0.690924	0.64755	0.64755	0.64755	0.791084	0.868835	0.853815	0.915823	0.611727	0.538795	0.538795	0.791084
Ea 1189	0.559	0.931667	0.849833	0.901417	0.931667	0.745333	0.716833	0.786167	0.745333	0.533583	0.671833	0.600917	0.833333	0.745333	0.716833	0.600917	0.716833	0.885833	0.559	0.559	0.745333	0.533583	0.58925	0.634667	0.745333	0.8975	0.600917	0.634667	0.650833	0.671833	0.600917	0.82075	0.716833	0.600917	0.833333	0.712	0.634667	0.942833	0.559	0.650833	0.950167	0.8975	0.650833	1.01725	0.600917	0.786167	0.716833	0.559	0.671833
CFBP 1430	0.609818	0.609818	0.655546	0.909091	0.813091	0.909091	0.692364	0.979091	0.661818	0.642818	0.692364	0.732909	0.692364	1.03655	0.582091	1.03655	0.692364	0.71	0.749636	0.949091	1.01636	0.71	0.71	0.857636	0.749636	0.71	0.609818	0.813091	0.838182	0.692364	0.776727	0.782	0.732909	0.782	0.692364	0.895364	0.655546	0.776727	1.03655	0.857636	0.749636	0.983364	0.582091	1.06409	0.582091	0.782	0.71	0.592091	1.07409
NCPPB 2080	0.858	0.634667	0.716833	0.931667	0.716833	1.01725	0.707083	1.1785	0.786167	0.786167	0.833333	0.790583	0.833333	0.885833	0.885833	1.01725	0.950167	0.833333	1.03075	0.833333	0.786167	0.931667	0.82075	1.06717	0.901417	0.885833	0.768333	0.950167	0.950167	0.8975	0.971833	0.824917	0.712	0.82075	0.768333	0.745333	0.745333	0.790583	0.768333	0.833333	0.800583	0.843333	0.895833	0.895833	1.02725	0.960167	0.843333	1.04075	0.843333
ATCC 49946	0.82075	0.790583	0.901417	0.671833	0.975417	0.650833	0.950167	0.786167	0.716833	0.8975	0.824917	0.8975	0.671833	0.745333	0.786167	0.671833	0.885833	0.786167	0.650833	0.858	0.786167	0.671833	1.01725	0.650833	0.83075	0.800583	0.911417	0.681833	0.985417	0.660833	0.960167	0.796167	0.726833	0.9075	0.834917	0.9075	0.681833	0.755333	0.796167	0.681833	0.895833	0.796167	0.660833	0.868	0.796167	0.681833	1.02725	0.660833	0.84075
Circularity	28ºC
Ea 1/79	0.943	1	1	0.904	0.885	0.788	1	0.923	0.907	0.928	1	0.925	0.926	0.948	0.988	0.907	0.924	0.877	1	0.943	0.9	0.906	1	1	0.947	1	0.906	1	0.92	0.928	0.994	0.844	0.927	0.941	1	0.823	0.936	1	0.974	0.996	0.974	0.949	0.95	0.915	0.933	0.953	1	1	1
Ea 1189	1	0.862	0.906	0.831	0.846	0.941	0.887	0.953	0.974	1	1	1	0.953	1	1	1	0.969	0.838	0.993	1	0.974	1	0.981	1	0.92	0.862	0.922	1	1	1	1	0.951	1	1	0.951	1	0.96	0.824	1	0.84	0.877	0.844	1	0.732	1	0.878	0.943	1	1
CFBP 1430	1	1	0.916	0.803	0.965	0.903	0.943	0.866	1	1	0.986	1	0.991	0.85	1	0.794	1	0.993	1	0.843	0.809	0.993	0.991	0.948	0.972	0.932	1	0.997	0.974	0.993	0.948	0.943	1	1	1	0.903	1	1	0.809	0.953	0.953	0.85	1	0.749	1	0.914	0.993	0.954	0.954
NCPPB 2080	0.924	1	1	0.846	0.96	0.859	0.984	0.761	0.879	0.924	0.97	0.949	0.884	0.819	0.81	0.811	0.846	0.951	0.816	0.906	0.903	0.812	0.885	0.63	0.846	0.866	0.936	0.825	0.73	0.907	0.812	0.884	0.952	0.902	0.829	0.919	1	0.945	0.897	0.927	0.925	0.9241	1.0001	1.0001	0.8461	0.9601	0.8591	0.9841	0.7611
ATCC 49946	1	1	1	0.978	0.974	1	0.991	0.991	0.96	0.9	0.883	1	0.947	1	1	0.795	0.924	0.929	0.901	0.683	0.924	0.994	0.947	0.991	0.864	0.961	0.884	0.851	0.866	0.966	0.95	0.991	0.976	0.929	1	0.922	1	0.986	0.827	0.795	0.786	0.825	0.943	0.795	0.843	0.809	0.948	0.917	0.971
Areas
[truncated: 367 more columns]
