# Supplementary material for: Erwinia amylovora psychrotrophic adaptations: evidence of pathogenic potential and survival at temperate and low environmental temperatures
Source: PubMed Central journal article supplement (PMC5660878; doi:10.7717/peerj.3931), 2017-10-26

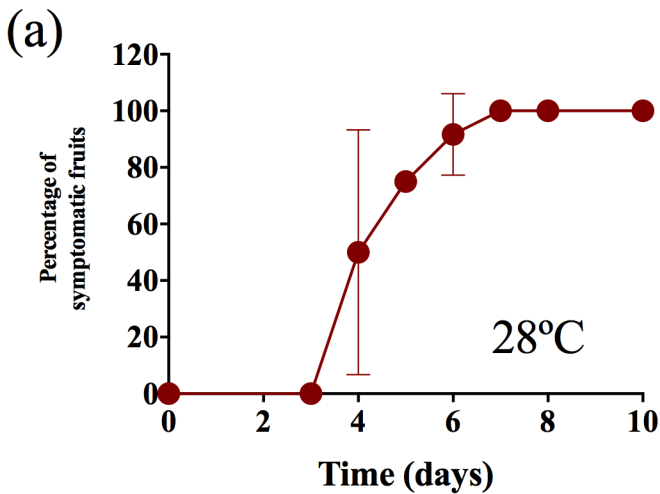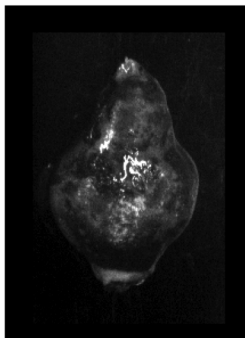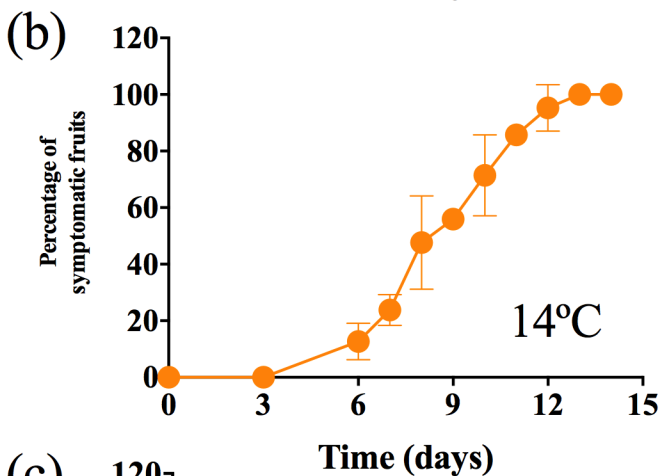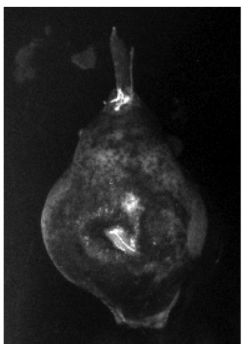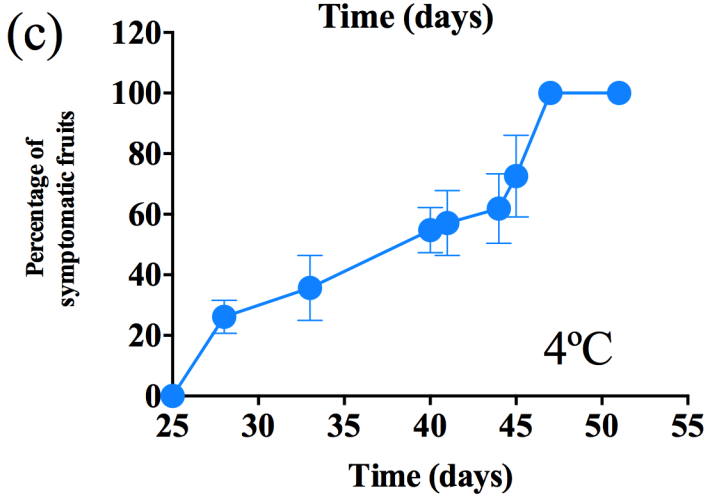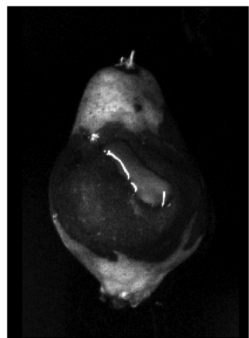

Supplement: peerj-05-3931-s001.pdf [file peerj-05-3931-s001.pdf]
